# Supplementary material for: Identification of 24-O-β-d-Glycosides and 7-Deoxy-Analogues of Okadaic Acid and Dinophysistoxin-1 and -2 in Extracts from Dinophysis Blooms, Dinophysis and Prorocentrum Cultures, and Shellfish in Europe, North America and Australasia
Source: Toxins (Basel). 2021 Jul 21;13(8):510. doi: 10.3390/toxins13080510 (PMC8402559; doi:10.3390/toxins13080510)
Supplement: Supplementary file 1 [file toxins-13-00510-s001.zip › Tables S2 and S3.xlsx]

## Sheet: Table S2_Neg product ions
			[M-H]-			Ion A			Ion B			Ion C			Ion D
	Origin		Formula	m/z	D (ppm)	Formula	m/z	D (ppm)	Formula	m/z	D (ppm)	Formula	m/z	D (ppm)	Formula	m/z	D (ppm)
	RM-Multi-toxin	1	C44H67O13-	803.46	1.3	C13H19O5-	255.124	0	C30H43O10-	563.286	0	C25H35O8-	ND	N/A	C19H29O4-	321.207	0.4
	D. acuta VGO1065			803.46	1.7		255.124	1.2		563.287	0.6		ND	N/A		321.207	1.1
	CRM-FDMT1			803.46	1.3		255.124	0.6		563.286	-0.4		ND	N/A		321.207	0.6
	P. lima JHPL2			803.46	1.4		255.124	0.3		563.286	-0.3		ND	N/A		321.207	0.4
	RM-Multi-toxin	2	C44H67O13-	803.46	1.5	C13H19O5-	255.124	0.2	C30H43O10-	563.286	-0.1	C25H35O8-	ND	N/A	C19H29O4-	321.207	0.8
	D. acuta VGO1065			803.46	1.7		255.124	1		563.287	0.6		ND	N/A		321.207	1.1
	CRM-FDMT1			803.46	1.3		255.124	0.5		563.286	-0.4		ND	N/A		321.207	0.5
	RM-Multi-toxin	3	C45H69O13-	817.476	1.4	C13H19O5-	255.124	0	C30H43O10-	563.286	-0.2	C25H35O8-	ND	N/A	C20H31O4-	335.223	0.5
	D. acuta VGO1065			817.476	1.6		255.124	1		563.287	0.6		ND	N/A		335.223	1.6
	CRM-FDMT1			817.476	1.4		255.124	0		563.286	-0.4		ND	N/A		335.223	0.4
	P. lima JHPL2			817.476	1.6		255.124	0.6		563.286	-0.5		ND	N/A		335.223	0.2
	Standard mix	4	C50H77O18-	965.513	1.4	C13H19O5-	255.124	1.8	C36H53O15-	725.341	2.5	C25H35O8-	463.234	1.4	C19H29O4-	321.207	1.2
	D. acuta VGO1065			965.514	2		255.124	1.7		725.34	1.4		463.235	1.8		321.207	0.7
	CRM-FDMT1			965.513	1.3		255.124	0.6		725.341	2.1		463.233	-1.4		321.207	-0.1
	Standard mix	5	C50H77O18-	965.513	1.5	C13H19O5-	255.124	1.2	C36H53O15-	725.34	1.4	C25H35O8-	463.234	0.5	C19H29O4-	321.207	1.2
	D. acuta VGO1065			965.514	2.5		255.124	2.2		725.341	2.9		463.235	2.1		321.208	1.8
	CRM-FDMT1			965.513	1.5		255.124	0.8		725.34	0.7		463.234	0.5		321.207	-0.4
	Norwegian mussel	6	C51H79O18-	979.529	1.8	C13H19O5-	255.124	-0.3	C36H53O15-	725.34	1.9	C25H35O8-	463.233	-1.9	C20H31O4-	335.223	-0.3
	CRM-FDMT1			979.529	1.3		255.124	0.3		725.341	2.8		463.234	0.2		335.223	0.7
	Standard mix	7	C44H67O12-	787.465	2	C13H19O4-	239.129	0.7	C30H43O9-	547.291	0.2	C25H35O7-	ND	N/A	C19H29O4-	321.207	1.1
	D. acuta VGO1065			787.466	2.4		239.129	0.7		547.292	0.5		ND	N/A		321.207	0.7
	CRM-FDMT1			787.466	2.7		239.129	-0.3		547.292	1.3		ND	N/A		321.207	-0.8
	P. lima IP197			787.465	1.2		239.129	-0.1		547.291	0.1		ND	0.5		321.207	0.6
	D. acuta VGO1065	8	C44H67O12-	787.465	1.9	C13H19O4-	239.129	2.4	C30H43O9-	547.293	2.3	C25H35O7-	ND	N/A	C19H29O4-	321.208	1.5
	CRM-FDMT1			787.465	1.1		239.129	-0.3		547.291	-0.6		ND	N/A		321.207	0
	CRM-FDMT1	9	C45H69O12-	801.481	1.4	C13H19O4-	239.129	0	C30H43O9-	547.291	-0.4	C25H35O7-	ND	N/A	C20H31O4-	335.223	2
	P. lima JHPL2			801.481	1.9		239.129	-0.8		547.292	2.2		ND	N/A		335.223	1.3

## Sheet: Table S3_Pos Na product ions
			[M+Na]+			Ion E			Ion F			Ion G			Ion H			Ion I			Ion J			Ion K			Ion L
	Sample		Formula	m/z	D (ppm)	Formula	m/z	D (ppm)	Formula	m/z	D (ppm)	Formula	m/z	D (ppm)	Formula	m/z	D (ppm)	Formula	m/z	D (ppm)	Formula	m/z	D (ppm)	Formula	m/z	D (ppm)	Formula	m/z	D (ppm)
	RM-Multi-toxin	1	C44H68O13Na+	827.455	-0.3	C40H60O10Na+	723.407	-1.1	C31H48O8Na+	571.323	-1.3	C24H36O6Na+	443.24	-0.6	C21H28O5Na+	ND	N/A	C26H36O7Na+	483.235	-0.1	C33H48O8Na+	595.323	-1.7	C14H24O3Na+	263.161	-1.8	C7H12O2Na+	151.073	-0.7
	D. acuta VGO1065			827.454	-1.2		723.407	-1		571.323	-1.7		443.24	0.2		ND	N/A		483.235	-0.4		595.323	-2.2		263.161	-1.5		151.073	0.7
	CRM-FDMT1			827.455	-0.5		723.408	0.5		571.324	-0.8		443.238	-5.8		ND	N/A		483.229	-13.2		595.324	0.1		ND	N/A		ND	N/A
	P. lima JHPL2			827.455	-0.5		723.408	-0.3		571.324	-0.8		443.241	0.5		ND	N/A		483.236	0.4		595.323	-1.6		263.161	-0.8		151.073	0.8
	RM-Multi-toxin	2	C44H68O13Na+	827.455	-0.3	C40H60O10Na+	723.407	-1.1	C31H48O8Na+	571.323	-1.2	C23H34O6Na+	429.225	0.1	C21H28O5Na+	ND	N/A	C26H36O7Na+	483.235	-0.3	C32H46O8Na+	581.308	-0.2	C14H24O3Na+	263.161	-2.3	C8H14O2Na+	165.089	1.1
	CRM-FDMT1			827.454	-1.3		723.406	-2.1		571.324	-0.4		429.224	-2.3		ND	N/A		483.236	1.9		581.309	0.4		263.162	-0.8		165.089	2
	D. acuta VGO1065			827.454	-1.1		723.407	-0.8		571.324	-0.8		429.225	0.6		ND	N/A		483.235	-0.2		581.308	-0.2		263.161	-2		165.089	-0.1
	RM-Multi-toxin	3	C45H70O13Na+	841.471	-0.3	C41H62O10Na+	737.421	-2.9	C32H50O8Na+	585.338	-2.4	C24H36O6Na+	443.24	-0.5	C21H28O5Na+	ND	N/A	C26H36O7Na+	483.235	-1.7	C33H48O8Na+	595.323	-1.3	C15H26O3Na+	277.177	-2.7	C8H14O2Na+	165.089	-0.5
	D. acuta VGO1065			841.471	-0.1		737.423	-1.3		585.34	0.1		443.24	-1.2		ND	N/A		483.236	1.8		595.324	-0.6		277.178	2.5		ND	N/A
	CRM-FDMT1			841.472	1		737.423	0		585.341	2.2		443.238	6		ND	N/A		483.231	-8		595.324	-0.9		277.175	-8.1		165.09	8.5
	P. lima JHPL2			841.471	-0.4		737.422	-1.8		585.339	-1.7		443.241	-0.7		ND	N/A		483.235	-0.5		595.323	-1.5		277.177	-2.7		165.089	0.1
	Standard mix	4	C50H78O18Na+	989.509	0.4	C46H70O15Na+	885.46	-1	C37H58O13Na+	733.376	-1.9	C30H46O11Na+	605.293	-0.5	C21H28O5Na+	383.182	-2	C32H46O12Na+	ND	N/A	C39H58O13Na+	757.376	-1.6	C14H24O3Na+	263.161	-1.8	C7H12O2Na+	151.073	-0.7
	D. acuta VGO1065			989.509	1.3		885.46	-0.9		733.377	0.7		605.292	-1.5		383.182	-1.3		ND	N/A		757.373	-5.3		263.162	0.4		151.074	7.5
	CRM-FDMT1			989.508	-0.5		885.462	1.5		733.378	1		605.293	0.3		383.183	-0.7		ND	N/A		757.376	-1.5		263.162	0.6		151.074	5.4
	Standard mix	5	C50H78O18Na+	989.508	0.1	C46H70O15Na+	885.459	-2.1	C37H58O13Na+	733.375	-2.7	C29H44O11Na+	591.277	-0.6	C21H28O5Na+	383.182	-1.5	C32H46O12Na+	ND	N/A	C38H56O13Na+	743.361	-1.1	C14H24O3Na+	263.161	-2.3	C8H14O2Na+	165.089	0.4
	CRM-FDMT1			989.509	0.7		885.461	0.4		733.377	0		591.275	-4.1		383.182	-2.4		ND	N/A		743.36	-1.5		263.161	-0.9		165.089	5.3
	D. acuta VGO1065			989.51	1.8		885.458	-3.4		733.375	-2.9		591.277	-1.4		383.182	-3		ND	N/A		743.36	-1.5		263.161	-2.3		165.089	0.2
	Indian Pt. mussel	6	C51H80O18Na+	1003.52	1	C47H72O15Na+	899.476	-0.7	C38H60O13Na+	747.395	3.3	C30H46O11Na+	605.291	-2.6	C21H28O5Na+	383.182	-2.8	C32H46O12Na+	ND	N/A	C39H58O13Na+	757.374	-4.1	C15H26O3Na+	277.179	6.5	C8H14O2Na+	ND	N/A
	NF mussel			1003.53	1.7		899.478	2.3		747.388	-6		605.291	-3.3		383.183	1.1		ND	N/A		757.375	-3.2		277.179	5.1		165.09	6.7
	CRM-FDMT1			1003.53	2.2		899.473	-3.7		747.395	3.8		605.289	-6.9		383.183	-0.4		ND	N/A		757.375	-3.3		ND	N/A		ND	N/A
	Standard mix	7	C44H68O12Na+	811.46	-0.6	C40H60O9Na+	707.413	-0.6	C31H48O8Na+	571.323	-1.5	C24H36O6Na+	443.24	-0.8	C21H28O4Na+	ND	N/A	C26H36O6Na+	467.24	-0.9	C33H48O7Na+	579.329	0.1	C14H24O3Na+	263.161	-0.9	C7H12O2Na+	151.073	0.7
	D. acuta VGO1065			811.459	-1.1		707.412	-1.4		571.324	0.1		443.239	-3.4		ND	N/A		467.24	-0.8		579.329	-0.2		263.161	-2		151.073	0.3
	P.lima IP197			811.46	-1		707.412	-1.9		571.325	0.8		443.24	-0.8		ND	N/A		467.241	0.8		579.33	0.6		263.162	-0.4		151.073	-0.1
	D. acuta VGO1065	8	C44H68O12Na+	811.46	-0.5	C40H60O9Na+	707.412	-1.5	C31H48O8Na+	571.322	-4	C23H34O6Na+	429.223	-4.6	C21H28O4Na+	ND	N/A	C26H36O6Na+	467.241	0.3	C32H46O7Na+	565.313	-1.7	C14H24O3Na+	263.161	-1.1	C8H14O2Na+	165.089	1.2
	P.lima IP197	9	C45H70O12Na+	825.476	0.6	C41H62O9Na+	721.429	0.1	C32H50O8Na+	585.336	-5.9	C24H36O6Na+	443.24	-0.7	C21H28O4Na+	ND	N/A	C26H36O6Na+	467.352	3.3	C33H48O7Na+	579.33	1.4	C15H26O3Na+	277.178	2.8	C8H14O2Na+	165.089	3.2
	P. lima JHPL2			825.475	-0.8		721.428	-0.7		585.341	1.6		443.239	-3.4		ND	N/A		467.242	2.5		579.329	-0.1		277.177	-2.3		165.089	1.2
